# Supplementary material
Source: Royal Society of Chemistry journal article supplement (doi:10.1039/d6py00394j)
Supplement: d6py00394j1.pdf [file d6py00394j1.pdf]

### Supporting information

## Bifunctional Group Distribution and Gradient Structure Resulting from the Anionic Copolymerization of Styrene and Vinylbenzyl N,N-Allylmethylamine

Kun Liu<sup>†</sup>, Xupeng Han<sup>†</sup>, Jiahao Zhou<sup>†</sup>, Yao Long, Min Zhang, Yayan Wang, Jiaping Tan, Meilin Liu, Lijun Li\*, Yali Li\*

Province Key Laboratory for Fine Petrochemical Catalysis and Separation, College of Chemistry and Chemical Engineering, Hunan Institute of Science and Technology, Yueyang, 414006, P. R. China.

<sup>†</sup> These authors contributed equally to this work.

\* Corresponding authors: [12018020@hnist.edu.cn](mailto:12018020@hnist.edu.cn) and [18574430562@163.com](mailto:18574430562@163.com)

Figures S1-S5

Figure S1

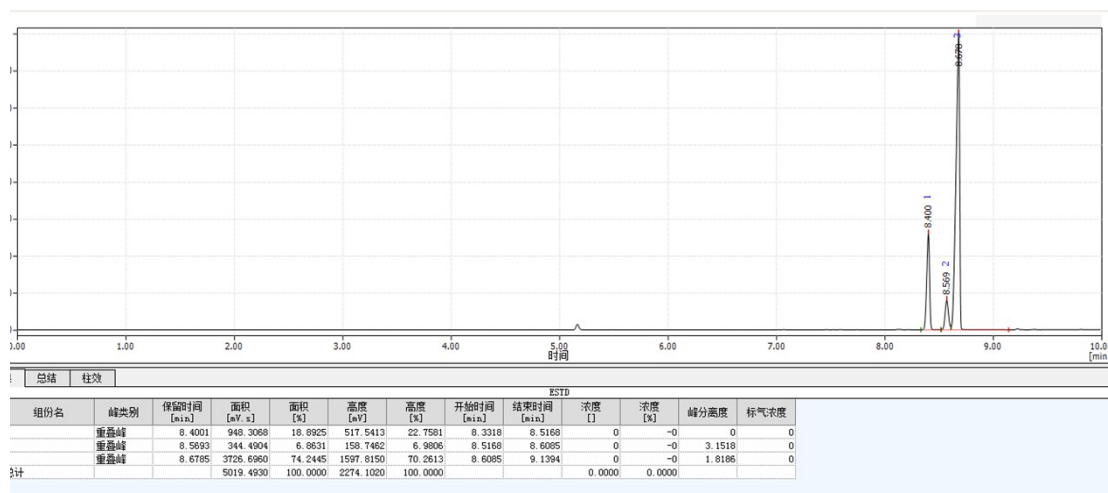

Figure S1. The GC spectrum of VBAMA isomers mixture synthesized in this work

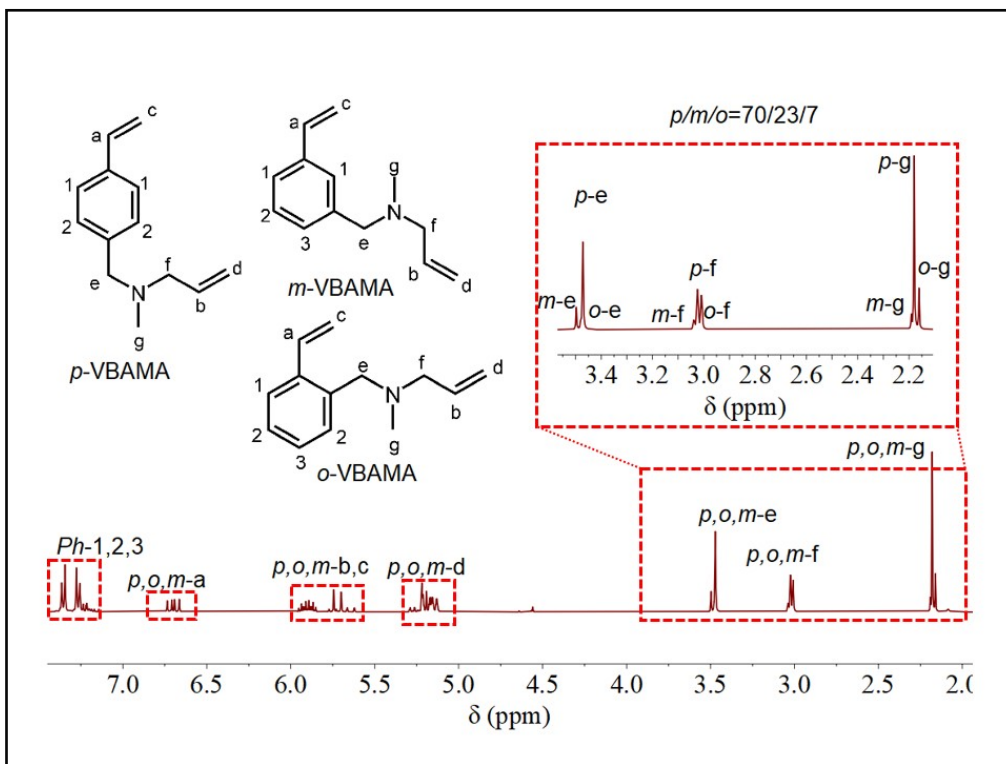

Figure S2. The  $^1\text{H}$  NMR spectrum of VBAMA isomers in  $\text{CDCl}_3$

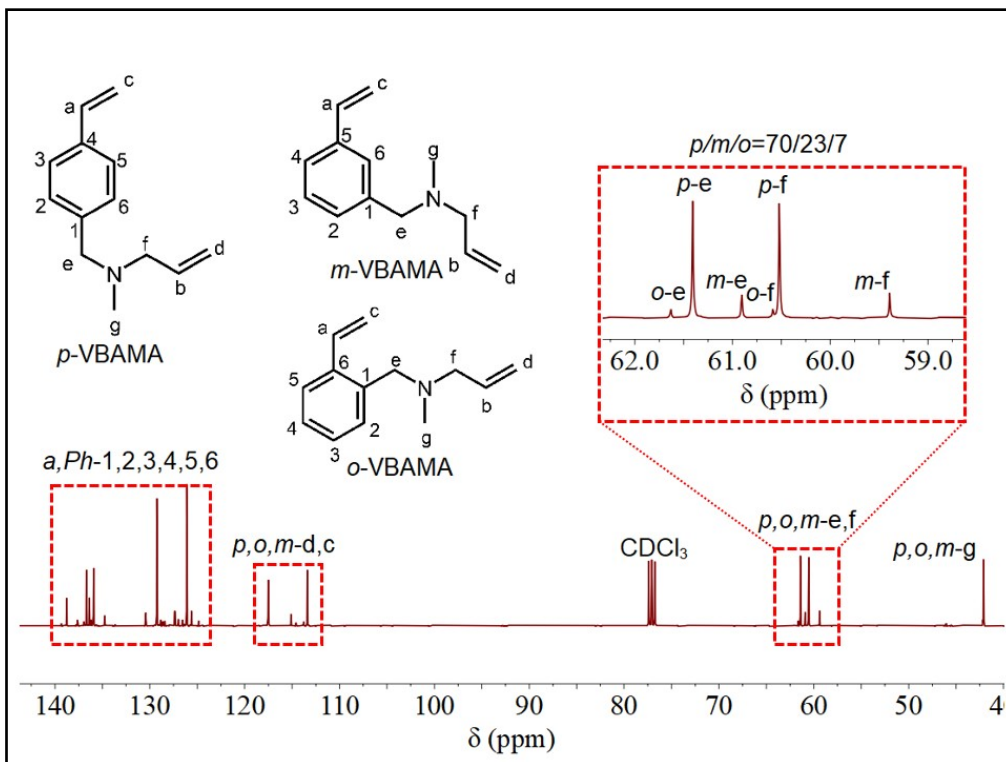

Figure S3. The  $^{13}\text{C}$  NMR spectrum of VBAMA isomers in  $\text{CDCl}_3$

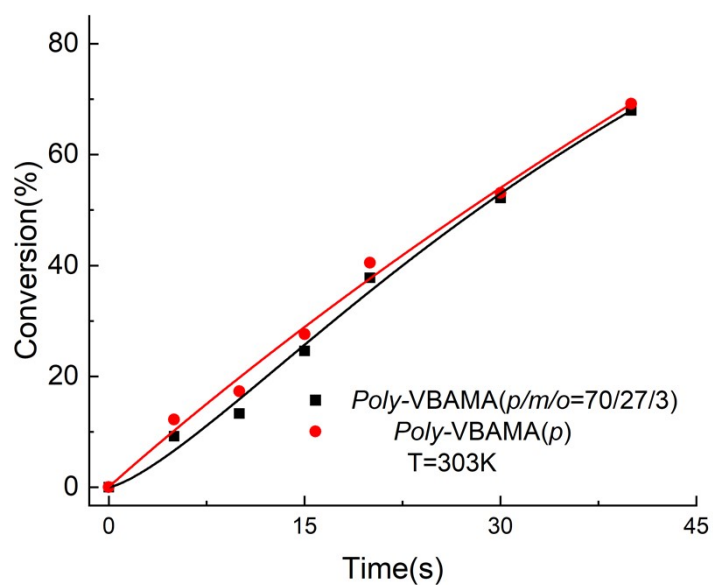

Figure S4. The homopolymerization conversion of VBAMA isomers (red line is para-VBAMA and black line is VBAMA mixture isomers) at 303K

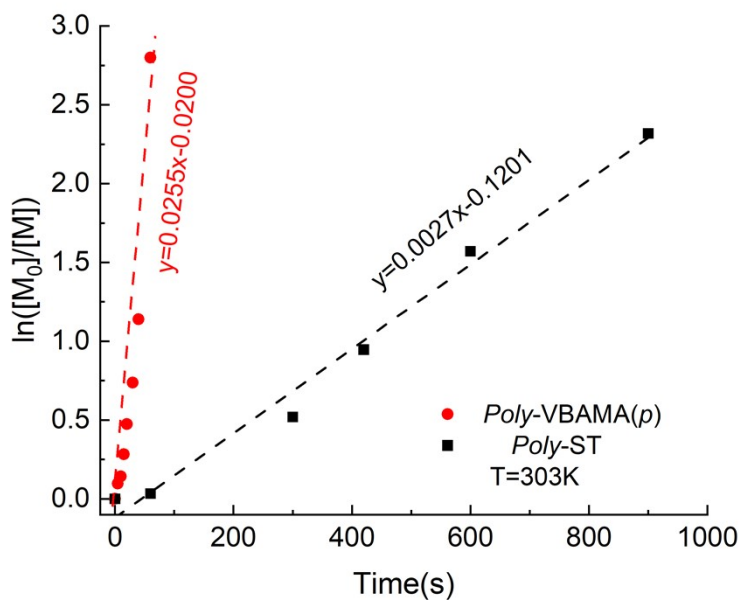

Figure S5. The first-order homopolymerization reaction curves (red line is VBAMA mixture isomers and black line is ST) at 303K

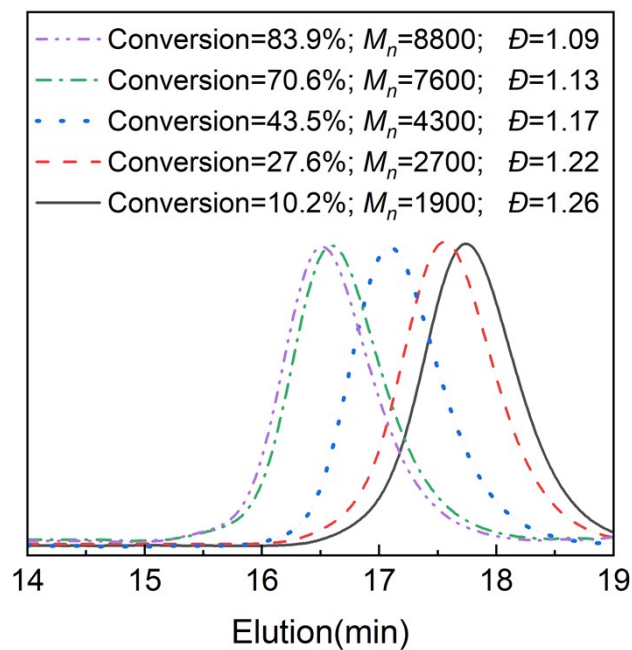

Figure S6. The SEC curves tracking the copolymerization process (ST/VBAMA=4/1 at 303K)

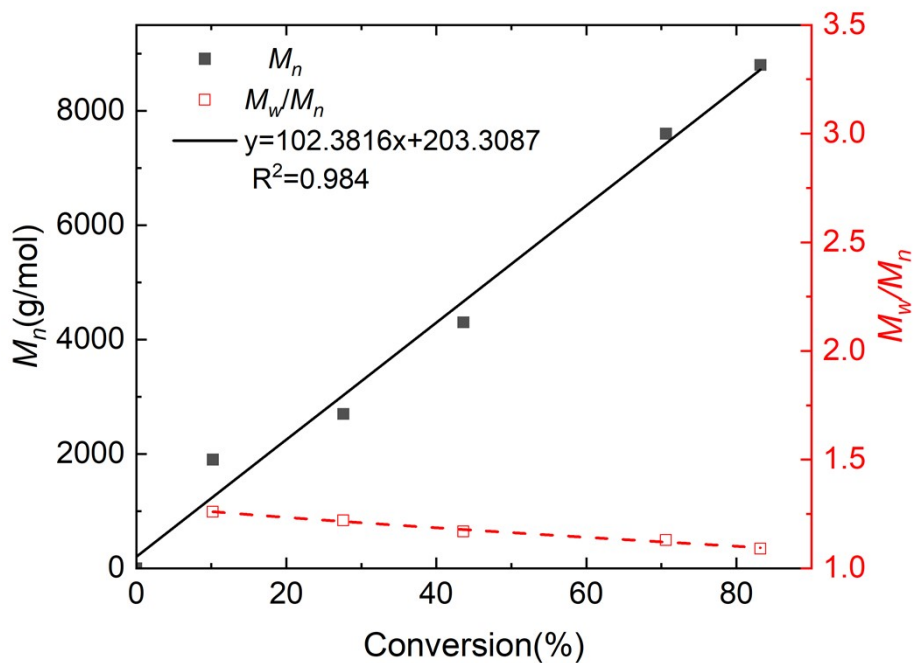

Figure S7. The copolymer  $M_n$  vs conversion (black line) and the  $M_w/M_n$  vs conversion (red line) (ST/VBAMA=4/1 at 303K)

Table S1. The key parameters used to determine the reactivity ratios of VBAMA and ST

| Comonomers   |              | $T(^{\circ}\text{C})$ | $f(\text{M}_1)$ | $f(\text{M}_2)$ | Conversion <sup>a</sup> | $F(\text{M}_1)/F(\text{M}_2)$ <sup>b</sup> |
|--------------|--------------|-----------------------|-----------------|-----------------|-------------------------|--------------------------------------------|
| $\text{M}_1$ | $\text{M}_2$ |                       |                 |                 |                         |                                            |
| VBAMA        | ST           | 30                    | 80.0%           | 20.0%           | 9.65%                   | 87.25%/12.75%                              |
| VBAMA        | ST           | 30                    | 75.0%           | 25.0%           | 8.62%                   | 83.50%/16.50%                              |
| VBAMA        | ST           | 30                    | 66.7%           | 33.3%           | 7.38%                   | 79.43%/20.57%                              |
| VBAMA        | ST           | 30                    | 50.0%           | 50.0%           | 2.53%                   | 64.35%/35.65%                              |
| VBAMA        | ST           | 30                    | 33.3%           | 66.7%           | 6.73%                   | 55.77%/44.23%                              |
| VBAMA        | ST           | 30                    | 25.0%           | 75.0%           | 13.22%                  | 44.99%/55.01%                              |
| VBAMA        | ST           | 30                    | 20.0%           | 80.0%           | 10.26%                  | 38.80%/61.20%                              |

<sup>a</sup> determined by weighting method;

<sup>b</sup> determined by HNMR data
